# Supplementary material for: Cytotoxic T lymphocytes targeting a conserved SARS-CoV-2 spike epitope are efficient serial killers
Source: bioRxiv or medRxiv preprint supplement (doi:10.1101/2022.01.24.477535), 2022-01-26
Supplement: Supplementary file [file media-1.pdf]

## SUPPLEMENTAL MATERIALS

### **Cytotoxic T lymphocytes targeting a conserved SARS-CoV-2 spike epitope are efficient serial killers**

*Mohsen Fathi<sup>1</sup>, Lindsey Charley<sup>1</sup>, Laurence J.N. Cooper<sup>1</sup>, Navin Varadarajan<sup>1,2</sup>, and Daniel Meyer<sup>1\*</sup>*

1. CellChorus Inc., Houston, TX, USA
2. Department of Chemical and Biomolecular Engineering, University of Houston, Houston, TX, USA

\*Corresponding author contact information:

Daniel Meyer, CellChorus Inc., 5000 Gulf Fwy, Bldg 4 Room 118, Houston, TX, USA, (832) 871-4836, [daniel@cellchorus.com](mailto:daniel@cellchorus.com)

## Supplementary Figure 1

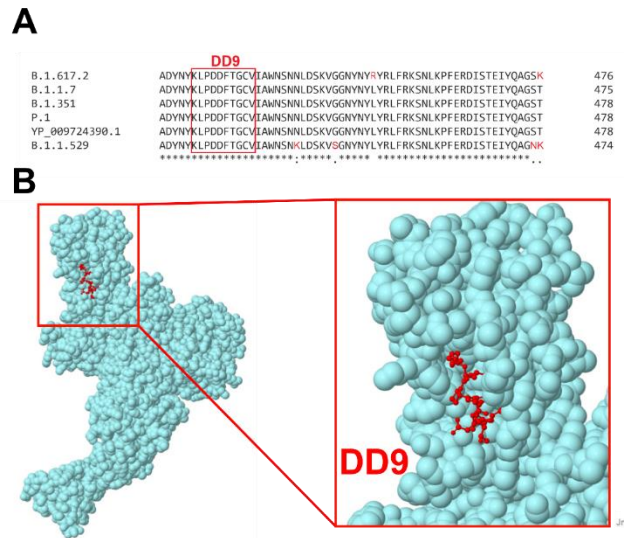

**Supplementary Figure 1:** (A) Multiple sequence alignment of the conserved epitope (DD9) on the spike protein of SARS-CoV-2 variants; YP\_009724390 (Wuhan), B.1.617.2 (Delta), B.1.1.7 (Alpha), B.1.351 (Beta), P.1 (Gamma), and B.1.1.529 (Omicron). All sequences were downloaded from NCBI and aligned by Clustal Omega. (B) 3D structure of SARS-CoV-2 spike protein (PDB ID 6VYB) highlighted with DD9 peptide in red (Constructed in Jmol: an open-source Java viewer for chemical structures in 3D. <http://www.jmol.org>).

## Supplementary Figure 2

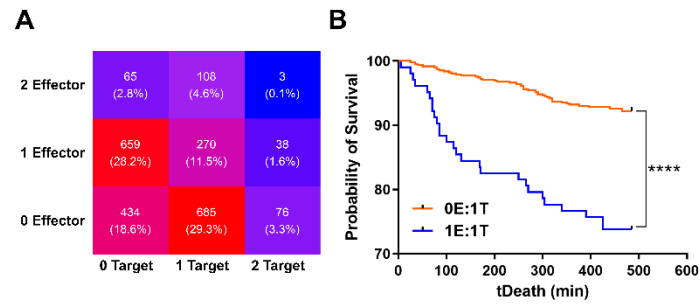

**Supplementary Figure 2:** (A) The distribution of T cells (effector) and target cells (target) in the nanowell array. (B) The Kaplan Meier survival curve of target cells in absence (0E:1T) and presence of one T cell (1E:1T).

**Supplementary Figure 3**

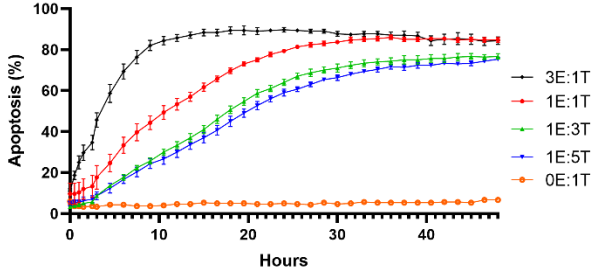

**Supplementary Figure 3:** The percentage of target cell apoptosis in different E:T ratios in a bulk assay for 48 hours (Cytation). All target cells were pre-incubated with peptide for 60 minutes before co-culturing.

## **Supplementary Videos**

**Supplementary Video S1:** Representative TIMING Videos (each containing one T cell and one or more target cells) displaying killer, non-killer, and serial killer T cells.

**Supplementary Video S2:** Representative TIMING Videos displaying a killer T cell detaching from a target cell before induction of apoptosis.

**Supplementary Video S3:** Representative TIMING Videos displaying differences in motility and polarization of T cells.

**Supplementary Video S4:** Representative TIMING Videos displaying single nanowells containing killer or non-killer T cells with differences in IFN $\gamma$  secretion.

**Supplementary Video S5:** Representative TIMING Videos displaying a killer T cell (1E:1T) succumbing to Activation-Induced Cell Death (AICD) and a serial killer T cell (1E:2T) resistant to AICD.
